# Supplementary material
Source: PubMed Central journal article supplement (PMC2628767)
Supplement: NIHMS3528-supplement-SuppInfo.pdf [file NIHMS3528-supplement-SuppInfo.pdf]

## Supplementary Information

### Surnames Lists used for 'medieval' sample ascertainment

**Bold type:** surnames sampled for study

**Bold underlined:** sampled surnames are spelling variants of originals

***Bold italics:*** sampled surnames with modern frequencies >20,000 (1998 figures)

### Wirral (Subsidy rolls of Henry VIII, 1545)

Adam, Allin, Alleyne, Andrew, Aspinall, Ball, Barber, **Barker**, Barrell, Barrow, Bailiff, **Beck**, **Bennett**, Bergs, **Billing**, **Bird**, Blackburne, Boland, Brant, Bratherton, Browne, Brunt, Burscough, **Bryde**, Burrows, **Bushell**, Caley, Carr, Carlile, Carlisle, Challoner, Charnock, Chantrell, Coley, **Colley**, Colton, Coke, Corf, **Corfe**, Corness, Cotton, Cowper, Cross, Dalby, Dane, Danold, Davey, Davy, Denham, Denson, Dobb, Doe, Done, Duke, Dunn, Edmonds, **Edmunds**, Ellcock, Fazackerley, Fiddler, Fidler, Foreshaw, **Forshaw**, Fox, Francis, Gallie, Gardener, Gardiner, Gardner, Garratt, Garrett, Gibson, **Gill**, Gleave, Glegg, Goodacre, Grace, Gray, Gregory, **Green**, Grey, Grice, Hale, Hancock, Hand, Hare, Harper, Harrison, Harvey, Heath, Helsby, Hender, **Hesketh**, Hey, Heyward, Hide, Hill, Hogg, Hole, Holme, **Holmes**, Home, **Hough**, Hulme, Hulmes, Humphrey, Huntington, Hynes, Jennion, Jensen, Jeunds, Johnson, Jump, **Kemp**, **Kirk**, **Kirkby**, Leck, Ledsham, Leighton, Lennard, Leonard, Ley, Lightfoot, Linacre, Little, **Lunt**, Macklin, Massie, Massey, Matthew, Mayle, Mayles, Middleton, Milner, Molyneux, Moss, Moulding, Mutton, Nelson, Newbold, Newton, Otter, Otty, Page, Parr, Pearson, Pemberton, Pendleton, Pennington, Penketh, Penney, Philip, Phylip, Pigot, Pinnington, Plumbe, Potter, Prenton, Pye, Pyke, Radcliffe, **Rathbone**, Ravenscroft, **Richardson**, Rider, Ridley, **Rimmer**, **Robinson**, Rogerson, Russell, Rutter, Saddler, Sadler, **Sampson**, Scaife, Scarff, Scarffe, **Scarisbrick**, Sclater, Scriven, Sefton, Sharpe, Shephard, Shepherd, **Sherlock**, **Skinner**, Smalley, Smythe, Spenser, Stones, Swain, Swaine, Swarbrick,

Swindley, Tarleton, **Taskar**, **Tellett**, Thomason, Thomasson, Thomson, Threadgill, Threadgold, **Tottey**, Totty, Tumath, Tyldesley, Wade, Wainwright, Walley, Walton, Warburton, Waring, Warrington, Watmough, Watt, Whalley, Wharton, Wilkinson, Williamson, Whitby, Whitehead, Whitelaw, Whitfield, Whitmore, Whittle, Whyte, Williamson, Willoughby, Worrall, Woods, Woodward, Wilcock, Wise, Wyse, **Young**, Yoxon.

*Placename-derived:* **Oxton, Raby, Upton.**

*From court proceedings, 1353:* **Harding**, Poole.

*From Ale-House licensing, 1572:* **Joynson**

**West Lancashire (names of those promising to contribute to the stipend of the priest of the altar of Our Lady of Ormskirk, 1366)**

Abbey, Ainscough, Alexson, Ashurst, Askins, Ashken, Astin, Aspinall, Aspinwall, Astmole, Aughton, Backhouse, Badger, **Balshaw**, Barker, Barret(t), Barrow, Barton, Baxter, Becokson, Benson, Bere, Bear, Bickerstaff, Bird, Blanchard, Blower, Blythe, Bligh, Bold, Bold(son), Bower, Brabourn, Bre(re)ton, Bretherton, Brotherton, Broadfield, Broadhead, Bromborough, Bronley, Brookfield, **Brown**, Burscough, Cadick, Caddick, Carpenter, **Carr**, Carter, Chalonner, Challener, Challender, Challenor, Charles, Checker, Childsfather, Clerk, Cole, **Coly**, **Cook**, **Cooper**, Coppell, Copphull, Cowdrey, Cowdray, Cowdroy, Cross, Davy, Deepdale, Dewacre, Dickinson, Dobson, Dodgeson, Dodgson, Drake, Eggacre, Ellerbeck, Ellin, Elliott, Fleming, **Fletcher**, Foster(son), Fox, Fresh, Fuller, Gilson, Goodacre, Greasby, Greaves, Green, Grey, **Gray**, Hall, Hallknave, Halshaw, Hamilton, Hancock, Hartblood, Haskin(s), Haskings, Heath, Helmes, Henry(son), Henson, Holbrook, **Holland**, **Holmes**, Horsecarr, Hubert, Hunt, Hurlton, **Huyton**, Irby, Jackson, Jones, **Jones(son)**, Kay, Kemp, Kendal, King, Kir(k)by, Lagard, Lauder, Leadbetter, Leigh/Lee/Lea, **Leyland**, Lone, Long, Longback, Longton, Maddoc(k), Marhall, Marriott, Marton, Maulby, Mell, **Melling**, Mercer, Messenger, Milner,

**Molyneux**, Moorcroft, Moorhills, More/Moore, Moss, Mossbury, Mossock, Nicholson, Nickson, Oldham, Ollif, Olton/Oulton, **Orell**, **Otty**, Outhead, Overton, Owenbreck, Overbeck, Owenson, Page, Parker, Parlement, Parr, Pawson, Peacock, Penidale/Pennydale, Penwortham, Petty, Pickhare, Pigeon, Platt, Porter, **Prescott**, Priestman, Pye/Pie, Rainford, Rainhill, Reader, Rideout, Riding, **Rimmer**, Roberts/Robertson, Robinson, Salter, Scholes/Scales, **Serjeant**/Sargeant, Shakalady, Shaw, Shuster, Smallshaw, Smithson, Sowerby, Spence, Spencer, Spicer, Spink(s), **Spurrier**, **Staynes**, **Steel**, **Stotfoldshaw**, **Stranger**, Such/Sutch/Souch/Zouch/Chuck/Chucks, Sutton, Swan, Tarbert, Taylor, Tew, Thomas(man), Thomas/Thompson etc,, **Thomasson**, Todd, Topping, Turner, Tyldesleigh, Vale, Walker, Wall, **Walsh**, Walterson, Waring, Warner, **Webster**, **Westhead**, Wild, Wildbold/Wildblood, Williams(son), Wilson, Winmarleigh, Wo(o)lfall, Woldes, Wolfall, Woodloft, Woods, Wyresdale, Yate(s).

*Placename-derived:* **Alker**, **Bilsborrow**, **Charnock**, **Corfe**, **Crombleholme**, *Gill*, **Hesketh**, **Hulme**, **Lunt**, **Pendleton**, **Penketh**, **Pennington**, **Rigby**, **Risley**, **Roby**, **Scarisbrick**, **Sephton**, **Swarbrick**
