# Supplementary material
Source: PubMed Central journal article supplement (PMC2628767)
Supplement: NIHMS3528-supplement-SuppTable.pdf [file NIHMS3528-supplement-SuppTable.pdf]

Supplementary Table showing haplotypes (Bowden et al.)

| sample | pop                | hg   | 19 | 388 | 390 | 391 | 392 | 393 |
|--------|--------------------|------|----|-----|-----|-----|-----|-----|
| MC-35  | MidCheshire        | E3b  | 13 | 12  | 24  | 10  | 11  | 13  |
| MC-17  | MidCheshire        | I    | 15 | 16  | 22  | 10  | 11  | 13  |
| MC-19  | MidCheshire        | I    | 14 | 16  | 22  | 10  | 11  | 13  |
| MC-30  | MidCheshire        | I    | 14 | 14  | 22  | 10  | 11  | 13  |
| MC-33  | MidCheshire        | I    | 14 | 14  | 23  | 10  | 11  | 13  |
| MC-40  | MidCheshire        | I    | 15 | 12  | 23  | 10  | 11  | 15  |
| MC-41  | MidCheshire        | I    | 15 | 13  | 23  | 10  | 12  | 15  |
| MC-46  | MidCheshire        | R1a1 | 15 | 12  | 25  | 10  | 11  | 13  |
| MC-52  | MidCheshire        | R1b  | 13 | 12  | 23  | 11  | 13  | 14  |
| MC-002 | MidCheshire        | R1b  | 14 | 12  | 23  | 11  | 13  | 13  |
| MC-12  | MidCheshire        | R1b  | 14 | 12  | 23  | 10  | 13  | 13  |
| MC-13  | MidCheshire        | R1b  | 14 | 12  | 23  | 11  | 13  | 13  |
| MC-15  | MidCheshire        | R1b  | 14 | 12  | 23  | 10  | 13  | 13  |
| MC-20  | MidCheshire        | R1b  | 14 | 12  | 23  | 11  | 13  | 13  |
| MC-21  | MidCheshire        | R1b  | 14 | 12  | 23  | 11  | 13  | 13  |
| MC-22  | MidCheshire        | R1b  | 14 | 12  | 23  | 11  | 13  | 13  |
| MC-24  | MidCheshire        | R1b  | 14 | 12  | 23  | 11  | 13  | 13  |
| MC-28  | MidCheshire        | R1b  | 14 | 12  | 23  | 12  | 13  | 13  |
| MC-36  | MidCheshire        | R1b  | 14 | 12  | 23  | 10  | 13  | 13  |
| MC-39  | MidCheshire        | R1b  | 14 | 12  | 23  | 11  | 13  | 13  |
| MC-4   | MidCheshire        | R1b  | 14 | 12  | 23  | 10  | 14  | 13  |
| MC-003 | MidCheshire        | R1b  | 14 | 12  | 24  | 10  | 14  | 13  |
| MC-16  | MidCheshire        | R1b  | 14 | 12  | 24  | 11  | 13  | 13  |
| MC-18  | MidCheshire        | R1b  | 14 | 12  | 24  | 11  | 13  | 13  |
| MC-27  | MidCheshire        | R1b  | 14 | 12  | 24  | 11  | 13  | 13  |
| MC-29  | MidCheshire        | R1b  | 14 | 12  | 24  | 10  | 13  | 13  |
| MC-31  | MidCheshire        | R1b  | 14 | 12  | 24  | 11  | 13  | 13  |
| MC-37  | MidCheshire        | R1b  | 14 | 12  | 24  | 10  | 13  | 13  |
| MC-42  | MidCheshire        | R1b  | 14 | 12  | 24  | 11  | 13  | 13  |
| MC-43  | MidCheshire        | R1b  | 14 | 12  | 24  | 10  | 13  | 13  |
| MC-44  | MidCheshire        | R1b  | 14 | 12  | 24  | 11  | 13  | 13  |
| MC-45  | MidCheshire        | R1b  | 14 | 12  | 24  | 11  | 13  | 12  |
| MC-50  | MidCheshire        | R1b  | 14 | 12  | 24  | 10  | 13  | 13  |
| MC-51  | MidCheshire        | R1b  | 14 | 12  | 24  | 11  | 13  | 13  |
| MC-34  | MidCheshire        | R1b  | 14 | 12  | 25  | 10  | 13  | 13  |
| MC-47  | MidCheshire        | R1b  | 14 | 12  | 25  | 11  | 13  | 13  |
| MC-5   | MidCheshire        | R1b  | 14 | 12  | 25  | 11  | 14  | 13  |
| MC-23  | MidCheshire        | R1b  | 14 | 13  | 23  | 11  | 13  | 13  |
| MC-26  | MidCheshire        | R1b  | 14 | 13  | 25  | 10  | 14  | 14  |
| MC-11  | MidCheshire        | R1b  | 14 | 14  | 24  | 12  | 13  | 13  |
| MC-32  | MidCheshire        | R1b  | 14 | 14  | 24  | 12  | 13  | 13  |
| MC-10  | MidCheshire        | R1b  | 15 | 12  | 23  | 10  | 13  | 13  |
| MC-9   | MidCheshire        | R1b  | 15 | 12  | 23  | 10  | 13  | 13  |
| MC-38  | MidCheshire        | R1b  | 15 | 12  | 24  | 10  | 13  | 13  |
| MC-49  | MidCheshire        | R1b  | 15 | 12  | 24  | 11  | 13  | 13  |
| MC-7   | MidCheshire        | R1b  | 15 | 12  | 25  | 11  | 13  | 13  |
| O-8    | WestLancs 'modern' | E3b  | 13 | 12  | 24  | 11  | 11  | 13  |
| O-10   | WestLancs 'modern' | I    | 15 | 15  | 23  | 10  | 11  | 13  |
| O-12   | WestLancs 'modern' | I    | 15 | 13  | 23  | 11  | 11  | 13  |
| O-18   | WestLancs 'modern' | I    | 14 | 14  | 22  | 10  | 11  | 13  |

Supplementary Table showing haplotypes (Bowden et al.)

| sample   | pop                | hg   | 19 | 388 | 390 | 391 | 392 | 393 |
|----------|--------------------|------|----|-----|-----|-----|-----|-----|
| O-21     | WestLancs 'modern' | I    | 14 | 14  | 22  | 10  | 11  | 13  |
| O-23     | WestLancs 'modern' | I    | 14 | 16  | 22  | 10  | 11  | 13  |
| O-25     | WestLancs 'modern' | I    | 13 | 14  | 22  | 11  | 11  | 13  |
| O-26     | WestLancs 'modern' | I    | 14 | 13  | 22  | 10  | 12  | 15  |
| O-28     | WestLancs 'modern' | I    | 14 | 14  | 22  | 10  | 11  | 13  |
| O-32     | WestLancs 'modern' | I    | 14 | 14  | 22  | 11  | 11  | 13  |
| O-34     | WestLancs 'modern' | I    | 13 | 14  | 22  | 10  | 11  | 13  |
| O-46     | WestLancs 'modern' | I    | 14 | 14  | 22  | 10  | 11  | 14  |
| O-5      | WestLancs 'modern' | I    | 14 | 14  | 23  | 10  | 11  | 13  |
| ORM-1    | WestLancs 'modern' | I    | 14 | 13  | 26  | 11  | 11  | 12  |
| ORM-2    | WestLancs 'modern' | I    | 14 | 14  | 22  | 10  | 11  | 13  |
| ORM-4    | WestLancs 'modern' | I    | 17 | 13  | 24  | 11  | 11  | 13  |
| ORM-7    | WestLancs 'modern' | I    | 14 | 14  | 23  | 10  | 11  | 13  |
| ORM-3    | WestLancs 'modern' | R1a1 | 15 | 10  | 25  | 10  | 11  | 13  |
| O-29     | WestLancs 'modern' | R1b  | 13 | 12  | 22  | 11  | 13  | 13  |
| O-14     | WestLancs 'modern' | R1b  | 13 | 12  | 24  | 11  | 13  | 13  |
| O-41     | WestLancs 'modern' | R1b  | 13 | 12  | 24  | 10  | 13  | 13  |
| O-15     | WestLancs 'modern' | R1b  | 13 | 12  | 25  | 11  | 13  | 13  |
| O-17     | WestLancs 'modern' | R1b  | 14 | 12  | 23  | 11  | 13  | 13  |
| O-27     | WestLancs 'modern' | R1b  | 14 | 12  | 23  | 11  | 14  | 13  |
| O-36     | WestLancs 'modern' | R1b  | 14 | 12  | 23  | 11  | 13  | 13  |
| O-37     | WestLancs 'modern' | R1b  | 14 | 12  | 23  | 11  | 13  | 13  |
| O-39     | WestLancs 'modern' | R1b  | 14 | 12  | 23  | 10  | 13  | 13  |
| O-40     | WestLancs 'modern' | R1b  | 14 | 12  | 23  | 11  | 13  | 13  |
| O-50     | WestLancs 'modern' | R1b  | 14 | 12  | 23  | 10  | 13  | 13  |
| O-6      | WestLancs 'modern' | R1b  | 14 | 12  | 23  | 10  | 13  | 13  |
| O-2      | WestLancs 'modern' | R1b  | 14 | 12  | 24  | 10  | 13  | 13  |
| O-31     | WestLancs 'modern' | R1b  | 14 | 12  | 24  | 10  | 13  | 13  |
| O-33     | WestLancs 'modern' | R1b  | 14 | 12  | 24  | 10  | 13  | 13  |
| O-38     | WestLancs 'modern' | R1b  | 14 | 12  | 24  | 11  | 14  | 13  |
| O-42     | WestLancs 'modern' | R1b  | 14 | 12  | 24  | 11  | 13  | 12  |
| O-43     | WestLancs 'modern' | R1b  | 14 | 12  | 24  | 11  | 13  | 13  |
| O-45     | WestLancs 'modern' | R1b  | 14 | 12  | 24  | 11  | 13  | 13  |
| O-49     | WestLancs 'modern' | R1b  | 14 | 12  | 24  | 11  | 13  | 14  |
| ORM-5    | WestLancs 'modern' | R1b  | 14 | 12  | 24  | 11  | 13  | 13  |
| O-1      | WestLancs 'modern' | R1b  | 14 | 12  | 25  | 11  | 14  | 13  |
| O-13     | WestLancs 'modern' | R1b  | 14 | 12  | 25  | 10  | 13  | 13  |
| O-24     | WestLancs 'modern' | R1b  | 14 | 12  | 25  | 11  | 13  | 13  |
| O-35     | WestLancs 'modern' | R1b  | 14 | 12  | 25  | 11  | 14  | 13  |
| O-4      | WestLancs 'modern' | R1b  | 14 | 12  | 25  | 11  | 13  | 13  |
| O-48     | WestLancs 'modern' | R1b  | 14 | 12  | 25  | 11  | 14  | 13  |
| O-7      | WestLancs 'modern' | R1b  | 14 | 12  | 25  | 11  | 14  | 13  |
| O-9      | WestLancs 'modern' | R1b  | 14 | 13  | 23  | 11  | 13  | 14  |
| O-20     | WestLancs 'modern' | R1b  | 15 | 12  | 23  | 11  | 13  | 13  |
| ORM-6    | WestLancs 'modern' | R1b  | 15 | 13  | 24  | 11  | 13  | 13  |
| WI-C-71  | Wirral 'modern'    | E3b  | 14 | 12  | 24  | 10  | 11  | 13  |
| WI-H-78  | Wirral 'modern'    | E3b  | 13 | 12  | 23  | 9   | 11  | 13  |
| WI-S-8   | Wirral 'modern'    | E3b  | 13 | 12  | 24  | 11  | 11  | 13  |
| WI-C-1   | Wirral 'modern'    | I    | 14 | 15  | 22  | 11  | 11  | 13  |
| WI-C-101 | Wirral 'modern'    | I    | 14 | 14  | 23  | 10  | 11  | 13  |
| WI-C-111 | Wirral 'modern'    | I    | 14 | 14  | 22  | 10  | 11  | 13  |

Supplementary Table showing haplotypes (Bowden et al.)

| sample     | pop             | hg   | 19 | 388 | 390 | 391 | 392 | 393 |
|------------|-----------------|------|----|-----|-----|-----|-----|-----|
| WI-C-134   | Wirral 'modern' | I    | 15 | 14  | 23  | 10  | 11  | 14  |
| WI-C-136   | Wirral 'modern' | I    | 14 | 14  | 23  | 11  | 11  | 13  |
| WI-C-21    | Wirral 'modern' | I    | 15 | 13  | 23  | 10  | 12  | 14  |
| WI-C-27    | Wirral 'modern' | I    | 14 | 13  | 22  | 11  | 11  | 13  |
| WI-C-62    | Wirral 'modern' | I    | 14 | 14  | 22  | 10  | 11  | 13  |
| WI-C-67    | Wirral 'modern' | I    | 15 | 13  | 23  | 10  | 12  | 15  |
| WI-N-002   | Wirral 'modern' | I    | 15 | 14  | 22  | 10  | 11  | 13  |
| wibeb006   | Wirral 'modern' | I    | 15 | 13  | 23  | 10  | 12  | 15  |
| WI-BEB-009 | Wirral 'modern' | I    | 14 | 14  | 23  | 10  | 11  | 13  |
| WI-BEB-013 | Wirral 'modern' | I    | 14 | 14  | 22  | 10  | 11  | 13  |
| WI-S-1     | Wirral 'modern' | I    | 16 | 13  | 22  | 11  | 11  | 14  |
| WI-S-12    | Wirral 'modern' | I    | 16 | 13  | 24  | 11  | 11  | 13  |
| WI-S-2     | Wirral 'modern' | I    | 14 | 16  | 22  | 10  | 11  | 13  |
| WI-S-3     | Wirral 'modern' | I    | 14 | 14  | 23  | 10  | 11  | 13  |
| WI-S-36    | Wirral 'modern' | I    | 15 | 14  | 23  | 10  | 11  | 13  |
| WI-S-38    | Wirral 'modern' | I    | 15 | 13  | 23  | 10  | 12  | 15  |
| WI-S-4     | Wirral 'modern' | I    | 14 | 14  | 22  | 10  | 11  | 14  |
| WI-S-40    | Wirral 'modern' | I    | 15 | 13  | 22  | 10  | 11  | 13  |
| WI-S-41    | Wirral 'modern' | I    | 15 | 14  | 24  | 10  | 11  | 13  |
| WI-S-7     | Wirral 'modern' | I    | 14 | 14  | 23  | 10  | 11  | 13  |
| WI-C-81    | Wirral 'modern' | K*   | 13 | 12  | 23  | 10  | 12  | 13  |
| WI-C-108   | Wirral 'modern' | R1a1 | 16 | 10  | 25  | 10  | 11  | 13  |
| WI-C-22    | Wirral 'modern' | R1a1 | 15 | 12  | 24  | 10  | 11  | 13  |
| WI-C-86    | Wirral 'modern' | R1a1 | 15 | 12  | 25  | 11  | 11  | 13  |
| WI-S-19    | Wirral 'modern' | R1a1 | 16 | 12  | 26  | 10  | 11  | 13  |
| WI-B-002   | Wirral 'modern' | R1b  | 14 | 12  | 25  | 10  | 14  | 13  |
| WI-B-012   | Wirral 'modern' | R1b  | 14 | 12  | 23  | 11  | 13  | 13  |
| WI-B-015   | Wirral 'modern' | R1b  | 14 | 12  | 24  | 11  | 13  | 13  |
| WI-B-017   | Wirral 'modern' | R1b  | 14 | 12  | 24  | 11  | 14  | 13  |
| WI-C-110   | Wirral 'modern' | R1b  | 14 | 12  | 23  | 11  | 13  | 13  |
| WI-C-125   | Wirral 'modern' | R1b  | 14 | 12  | 22  | 11  | 13  | 14  |
| WI-C-127   | Wirral 'modern' | R1b  | 14 | 12  | 24  | 10  | 13  | 14  |
| WI-C-130   | Wirral 'modern' | R1b  | 14 | 12  | 24  | 10  | 13  | 14  |
| WI-C-132   | Wirral 'modern' | R1b  | 14 | 12  | 23  | 10  | 13  | 13  |
| WI-C-133   | Wirral 'modern' | R1b  | 14 | 12  | 23  | 9   | 13  | 13  |
| WI-C-141   | Wirral 'modern' | R1b  | 14 | 12  | 26  | 10  | 14  | 14  |
| WI-C-23    | Wirral 'modern' | R1b  | 14 | 12  | 24  | 11  | 13  | 13  |
| WI-C-24    | Wirral 'modern' | R1b  | 14 | 12  | 24  | 10  | 13  | 13  |
| WI-C-28    | Wirral 'modern' | R1b  | 14 | 12  | 25  | 11  | 13  | 12  |
| WI-C-29    | Wirral 'modern' | R1b  | 14 | 12  | 23  | 13  | 13  | 13  |
| WI-C-41    | Wirral 'modern' | R1b  | 15 | 12  | 24  | 10  | 13  | 13  |
| WI-C-42    | Wirral 'modern' | R1b  | 14 | 12  | 24  | 11  | 13  | 13  |
| WI-C-43    | Wirral 'modern' | R1b  | 14 | 12  | 23  | 11  | 13  | 13  |
| WI-C-44    | Wirral 'modern' | R1b  | 14 | 12  | 23  | 10  | 13  | 13  |
| WI-C-46    | Wirral 'modern' | R1b  | 14 | 12  | 23  | 10  | 13  | 13  |
| WI-C-48    | Wirral 'modern' | R1b  | 14 | 12  | 23  | 11  | 13  | 13  |
| WI-C-52    | Wirral 'modern' | R1b  | 14 | 12  | 23  | 11  | 13  | 13  |
| WI-C-53    | Wirral 'modern' | R1b  | 14 | 12  | 24  | 11  | 13  | 13  |
| WI-C-54    | Wirral 'modern' | R1b  | 14 | 12  | 23  | 11  | 13  | 13  |
| WI-C-55    | Wirral 'modern' | R1b  | 14 | 13  | 23  | 11  | 13  | 13  |
| WI-C-56    | Wirral 'modern' | R1b  | 14 | 12  | 25  | 11  | 13  | 13  |
| WI-C-61    | Wirral 'modern' | R1b  | 14 | 12  | 24  | 11  | 13  | 14  |

Supplementary Table showing haplotypes (Bowden et al.)

| sample     | pop                  | hg  | 19 | 388 | 390 | 391 | 392 | 393 |
|------------|----------------------|-----|----|-----|-----|-----|-----|-----|
| WI-C-63    | Wirral 'modern'      | R1b | 15 | 12  | 24  | 11  | 13  | 13  |
| WI-C-65    | Wirral 'modern'      | R1b | 14 | 12  | 24  | 11  | 13  | 13  |
| WI-C-68    | Wirral 'modern'      | R1b | 14 | 12  | 24  | 10  | 14  | 13  |
| WI-C-69    | Wirral 'modern'      | R1b | 14 | 12  | 23  | 11  | 13  | 13  |
| WI-C-70    | Wirral 'modern'      | R1b | 14 | 12  | 23  | 11  | 14  | 13  |
| WI-C-72    | Wirral 'modern'      | R1b | 14 | 12  | 24  | 10  | 13  | 13  |
| WI-C-85    | Wirral 'modern'      | R1b | 14 | 12  | 23  | 11  | 13  | 13  |
| WI-H-102   | Wirral 'modern'      | R1b | 14 | 12  | 23  | 10  | 13  | 13  |
| WI-H-103   | Wirral 'modern'      | R1b | 14 | 12  | 24  | 10  | 13  | 13  |
| WI-H-104   | Wirral 'modern'      | R1b | 14 | 12  | 24  | 11  | 13  | 13  |
| WI-H-107   | Wirral 'modern'      | R1b | 14 | 12  | 23  | 11  | 13  | 13  |
| WI-H-51    | Wirral 'modern'      | R1b | 14 | 12  | 23  | 11  | 13  | 14  |
| WI-N-004   | Wirral 'modern'      | R1b | 14 | 12  | 24  | 10  | 13  | 13  |
| WI-N-007   | Wirral 'modern'      | R1b | 15 | 12  | 24  | 11  | 13  | 14  |
| WI-N-5     | Wirral 'modern'      | R1b | 16 | 12  | 24  | 11  | 13  | 13  |
| WI-T-1     | Wirral 'modern'      | R1b | 14 | 12  | 23  | 11  | 13  | 13  |
| WI-T-8     | Wirral 'modern'      | R1b | 14 | 12  | 24  | 11  | 13  | 13  |
| WI-T-9     | Wirral 'modern'      | R1b | 14 | 12  | 23  | 11  | 13  | 13  |
| WI-W-002   | Wirral 'modern'      | R1b | 14 | 12  | 23  | 11  | 13  | 13  |
| WI-W-005   | Wirral 'modern'      | R1b | 14 | 12  | 22  | 10  | 13  | 13  |
| WI-W-006   | Wirral 'modern'      | R1b | 14 | 12  | 23  | 11  | 13  | 13  |
| WI-W-007   | Wirral 'modern'      | R1b | 14 | 12  | 24  | 11  | 13  | 13  |
| WI-W-008   | Wirral 'modern'      | R1b | 14 | 12  | 23  | 11  | 13  | 13  |
| WI-W-011   | Wirral 'modern'      | R1b | 14 | 12  | 24  | 10  | 13  | 13  |
| WI-BEB-002 | Wirral 'modern'      | R1b | 14 | 12  | 24  | 10  | 13  | 13  |
| wibeb004   | Wirral 'modern'      | R1b | 14 | 12  | 24  | 11  | 13  | 13  |
| WI-BEB-012 | Wirral 'modern'      | R1b | 14 | 12  | 23  | 12  | 13  | 13  |
| wibeb016   | Wirral 'modern'      | R1b | 14 | 12  | 24  | 10  | 13  | 13  |
| wibeb017   | Wirral 'modern'      | R1b | 14 | 12  | 24  | 11  | 13  | 13  |
| wibeb019   | Wirral 'modern'      | R1b | 14 | 12  | 24  | 10  | 13  | 13  |
| wibeb020   | Wirral 'modern'      | R1b | 14 | 12  | 24  | 10  | 13  | 14  |
| WI-S-13    | Wirral 'modern'      | R1b | 14 | 12  | 24  | 10  | 13  | 14  |
| WI-S-14    | Wirral 'modern'      | R1b | 14 | 12  | 24  | 11  | 13  | 13  |
| WI-S-16    | Wirral 'modern'      | R1b | 14 | 12  | 23  | 10  | 13  | 13  |
| WI-S-17    | Wirral 'modern'      | R1b | 14 | 12  | 22  | 11  | 13  | 13  |
| WI-S-18    | Wirral 'modern'      | R1b | 15 | 12  | 24  | 11  | 13  | 13  |
| WI-S-31    | Wirral 'modern'      | R1b | 14 | 12  | 24  | 11  | 13  | 13  |
| WI-S-32    | Wirral 'modern'      | R1b | 14 | 12  | 24  | 11  | 13  | 13  |
| WI-S-33    | Wirral 'modern'      | R1b | 14 | 12  | 24  | 11  | 13  | 13  |
| WI-S-39    | Wirral 'modern'      | R1b | 14 | 12  | 24  | 11  | 13  | 13  |
| WI-S-51    | Wirral 'modern'      | R1b | 14 | 12  | 23  | 11  | 13  | 13  |
| WI-S-9     | Wirral 'modern'      | R1b | 14 | 12  | 23  | 11  | 13  | 13  |
| 183        | WestLancs 'medieval' | E3b | 13 | 12  | 24  | 10  | 11  | 13  |
| 34         | WestLancs 'medieval' | E3b | 13 | 13  | 23  | 10  | 11  | 13  |
| 186        | WestLancs 'medieval' | E3b | 13 | 12  | 24  | 10  | 11  | 13  |
| 136        | WestLancs 'medieval' | G   | 15 | 12  | 22  | 10  | 10  | 13  |
| 134        | WestLancs 'medieval' | I   | 14 | 14  | 23  | 10  | 11  | 13  |
| 7          | WestLancs 'medieval' | I   | 14 | 16  | 22  | 10  | 11  | 15  |
| 111        | WestLancs 'medieval' | I   | 15 | 14  | 22  | 10  | 11  | 13  |
| 179        | WestLancs 'medieval' | I   | 14 | 14  | 22  | 10  | 11  | 13  |
| 151        | WestLancs 'medieval' | I   | 15 | 14  | 22  | 10  | 11  | 13  |

Supplementary Table showing haplotypes (Bowden et al.)

| sample | pop       | hg         | 19   | 388 | 390 | 391 | 392 | 393 |    |
|--------|-----------|------------|------|-----|-----|-----|-----|-----|----|
| 50     | WestLancs | 'medieval' | J2   | 16  | 16  | 23  | 9   | 11  | 12 |
| 177    | WestLancs | 'medieval' | K*   | 15  | 13  | 22  | 10  | 12  | 15 |
| 191    | WestLancs | 'medieval' | K*   | 14  | 12  | 23  | 11  | 14  | 14 |
| 133    | WestLancs | 'medieval' | R1a1 | 15  | 12  | 27  | 11  | 11  | 13 |
| 189    | WestLancs | 'medieval' | R1a1 | 14  | 12  | 24  | 10  | 11  | 13 |
| 163    | WestLancs | 'medieval' | R1a1 | 15  | 13  | 25  | 10  | 13  | 13 |
| 92     | WestLancs | 'medieval' | R1a1 | 16  | 10  | 26  | 10  | 11  | 13 |
| 93     | WestLancs | 'medieval' | R1a1 | 15  | 12  | 25  | 7   | 11  | 12 |
| 91     | WestLancs | 'medieval' | R1a1 | 15  | 12  | 25  | 10  | 11  | 13 |
| 121    | WestLancs | 'medieval' | R1a1 | 15  | 12  | 25  | 11  | 11  | 14 |
| 170    | WestLancs | 'medieval' | R1b  | 14  | 12  | 24  | 10  | 13  | 13 |
| 145    | WestLancs | 'medieval' | R1b  | 14  | 12  | 24  | 11  | 13  | 13 |
| 205    | WestLancs | 'medieval' | R1b  | 14  | 12  | 24  | 10  | 13  | 14 |
| 198    | WestLancs | 'medieval' | R1b  | 14  | 12  | 24  | 10  | 13  | 13 |
| 201    | WestLancs | 'medieval' | R1b  | 14  | 12  | 23  | 11  | 13  | 13 |
| 80     | WestLancs | 'medieval' | R1b  | 14  | 12  | 23  | 11  | 13  | 13 |
| 162    | WestLancs | 'medieval' | R1b  | 15  | 12  | 24  | 11  | 13  | 13 |
| 83     | WestLancs | 'medieval' | R1b  | 14  | 12  | 23  | 11  | 13  | 13 |
| 138    | WestLancs | 'medieval' | R1b  | 14  | 12  | 23  | 11  | 13  | 13 |
| 40     | WestLancs | 'medieval' | R1b  | 14  | 12  | 24  | 10  | 14  | 13 |
| 97     | WestLancs | 'medieval' | R1b  | 14  | 12  | 24  | 11  | 13  | 13 |
| 38     | WestLancs | 'medieval' | R1b  | 14  | 12  | 23  | 11  | 13  | 13 |
| 199    | WestLancs | 'medieval' | R1b  | 14  | 12  | 25  | 11  | 14  | 13 |
| 200    | WestLancs | 'medieval' | R1b  | 15  | 12  | 23  | 11  | 13  | 12 |
| 122    | WestLancs | 'medieval' | R1b  | 15  | 12  | 24  | 11  | 13  | 12 |
| 166    | WestLancs | 'medieval' | R1b  | 14  | 12  | 25  | 10  | 13  | 13 |
| 204    | WestLancs | 'medieval' | R1b  | 14  | 12  | 25  | 10  | 14  | 13 |
| 141    | WestLancs | 'medieval' | R1b  | 14  | 12  | 23  | 11  | 13  | 13 |
| 203    | WestLancs | 'medieval' | R1b  | 14  | 12  | 23  | 11  | 13  | 13 |
| 98     | WestLancs | 'medieval' | R1b  | 14  | 12  | 23  | 11  | 13  | 13 |
| 197    | WestLancs | 'medieval' | R1b  | 14  | 12  | 23  | 10  | 13  | 13 |
| 173    | WestLancs | 'medieval' | R1b  | 15  | 13  | 24  | 11  | 13  | 13 |
| 128    | WestLancs | 'medieval' | R1b  | 14  | 12  | 24  | 10  | 13  | 12 |
| 22     | Wirral    | 'medieval' | R1b  | 14  | 12  | 23  | 10  | 13  | 13 |
| 41     | Wirral    | 'medieval' | E3a  | 16  | 12  | 21  | 10  | 11  | 13 |
| 14     | Wirral    | 'medieval' | E3b  | 13  | 12  | 22  | 9   | 11  | 13 |
| 74     | Wirral    | 'medieval' | G    | 15  | 12  | 22  | 10  | 11  | 13 |
| 85     | Wirral    | 'medieval' | I    | 14  | 9   | 22  | 10  | 11  | 13 |
| 33     | Wirral    | 'medieval' | I    | 15  | 14  | 22  | 10  | 11  | 13 |
| 17     | Wirral    | 'medieval' | I    | 14  | 14  | 23  | 10  | 11  | 13 |
| 54     | Wirral    | 'medieval' | I    | 15  | 14  | 24  | 11  | 11  | 13 |
| 28     | Wirral    | 'medieval' | I    | 14  | 14  | 23  | 10  | 11  | 13 |
| 94     | Wirral    | 'medieval' | K*   | 15  | 13  | 23  | 11  | 12  | 14 |
| 109    | Wirral    | 'medieval' | R1a1 | 16  | 9   | 25  | 10  | 11  | 13 |
| 112    | Wirral    | 'medieval' | R1a1 | 15  | 12  | 25  | 11  | 11  | 13 |
| 78     | Wirral    | 'medieval' | R1a1 | 15  | 12  | 25  | 10  | 11  | 13 |
| 104    | Wirral    | 'medieval' | R1a1 | 15  | 12  | 25  | 10  | 11  | 13 |
| 73     | Wirral    | 'medieval' | R1a1 | 15  | 10  | 24  | 10  | 11  | 13 |
| 72     | Wirral    | 'medieval' | R1b  | 14  | 12  | 24  | 10  | 13  | 14 |
| 35     | Wirral    | 'medieval' | R1b  | 14  | 12  | 24  | 11  | 13  | 13 |
| 68     | Wirral    | 'medieval' | R1b  | 16  | 13  | 22  | 10  | 11  | 14 |

Supplementary Table showing haplotypes (Bowden et al.)

| sample | pop               | hg  | 19 | 388 | 390 | 391 | 392 | 393 |
|--------|-------------------|-----|----|-----|-----|-----|-----|-----|
| 115    | Wirral 'medieval' | R1b | 14 | 12  | 24  | 11  | 13  | 13  |
| 26     | Wirral 'medieval' | R1b | 14 | 12  | 24  | 10  | 13  | 13  |
| 16     | Wirral 'medieval' | R1b | 14 | 12  | 24  | 11  | 13  | 13  |
| 106    | Wirral 'medieval' | R1b | 14 | 13  | 24  | 11  | 13  | 13  |
| 32     | Wirral 'medieval' | R1b | 14 | 12  | 24  | 11  | 13  | 14  |
| 30     | Wirral 'medieval' | R1b | 14 | 12  | 25  | 11  | 13  | 12  |
| 13     | Wirral 'medieval' | R1b | 14 | 12  | 23  | 11  | 13  | 13  |
| 103    | Wirral 'medieval' | R1b | 14 | 12  | 24  | 11  | 13  | 14  |
| 15     | Wirral 'medieval' | R1b | 14 | 12  | 23  | 11  | 13  | 13  |
| 108    | Wirral 'medieval' | R1b | 14 | 12  | 24  | 11  | 13  | 13  |
| 113    | Wirral 'medieval' | R1b | 15 | 12  | 23  | 11  | 13  | 13  |
| 6      | Wirral 'medieval' | R1b | 14 | 12  | 23  | 10  | 13  | 13  |
| 82     | Wirral 'medieval' | R1b | 14 | 12  | 24  | 11  | 13  | 13  |
| 110    | Wirral 'medieval' | R1b | 14 | 12  | 23  | 12  | 13  | 13  |
| 105    | Wirral 'medieval' | R1b | 14 | 12  | 23  | 11  | 13  | 13  |
| 56     | Wirral 'medieval' | R1b | 14 | 12  | 24  | 11  | 13  | 13  |
| 100    | Wirral 'medieval' | R1b | 14 | 12  | 24  | 10  | 13  | 13  |
| 21     | Wirral 'medieval' | R1b | 14 | 12  | 23  | 11  | 13  | 13  |
| 99     | Wirral 'medieval' | R1b | 14 | 12  | 24  | 11  | 13  | 13  |

Gray-shading indicates samples associated with surnames of frequency (1998)>20,000
